# Supplementary material for: Improved H2S gas sensing properties of ZnO nanorods decorated by a several nm ZnS thin layer
Source: Royal Society of Chemistry journal article supplement (doi:10.1039/c4cp00906a), 2014-01-01
Supplement: c4cp00906a1.pdf [file c4cp00906a1.pdf]

## Electronic Supplementary Information (ESI)

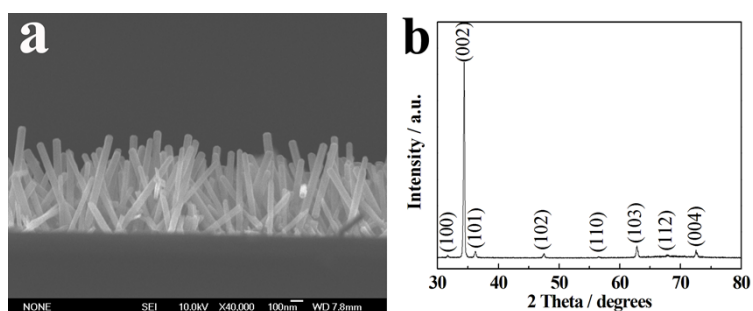

**Figure S1.** (a) Cross-section FE-SEM image of oriented ZnO nanorods. (b) XRD pattern of the oriented ZnO nanorods.

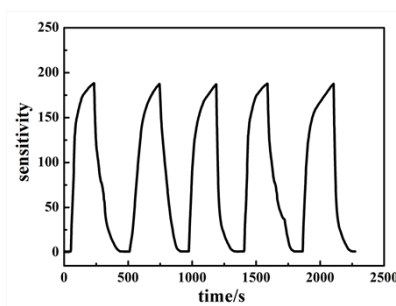

**Figure S2.** Repeatability test of the sensor based on passivated ZnO nanorods at optimum condition to 500 ppm H<sub>2</sub>S.

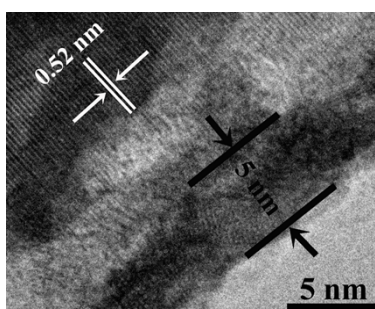

**Figure S3.** TEM image of ZnO nanorod passivated in 10 ppm H<sub>2</sub>S for 300 s.

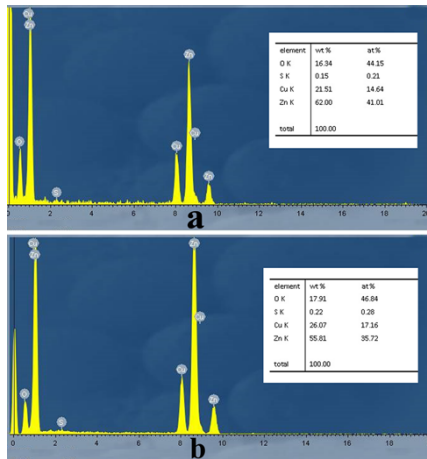

**Figure S4.** The EDS data of ZnO nanorods passivated in 10 ppm H<sub>2</sub>S for different times. (a) 200 s; (b) 300 s.

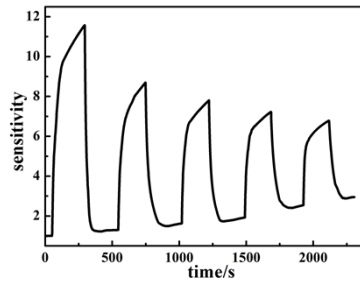

**Figure S5.** Repeatability of ZnO nanorods-based sensors in detection of 1 ppm H<sub>2</sub>S after being passivated in 10 ppm H<sub>2</sub>S for 200 s without annealing at 150°C.
